# Supplementary material for: Polyphenolic Compounds of Crataegus Berry, Leaf, and Flower Extracts Affect Viability and Invasive Potential of Human Glioblastoma Cells
Source: MDPI journal article supplement (doi:10.3390/molecules26092656), 2021-05-01
Supplement: s1 [file s1]

Supplementary material

# Polyphenolic Compounds of *Crataegus* Berry, Leaf and Flower Extracts Affect Viability and Invasive Potential of Human Glioblastoma Cells

Natalia Żurek <sup>1,a</sup>, Olena Karatsai <sup>2,a</sup>, Maria Jolanta Rędownicz <sup>1,2,\*</sup> and Ireneusz Kapusta <sup>1,b</sup>

<sup>1</sup> Institute of Food Technology and Nutrition, University of Rzeszow, 4 Zelwerowicza St., 35-601 Rzeszow, Poland; nzurek@ur.edu.pl, ikapusta@ur.edu.pl, j.redowicz@nencki.edu.pl

<sup>2</sup> Nencki Institute of Experimental Biology, Polish Academy of Sciences, 3 Pasteur St., 02-093 Warsaw, Poland; o.karatsai@nencki.edu.pl, j.redowicz@nencki.edu.pl

\* Correspondence: ikapusta@ur.edu.pl; Tel.: +48-17-785-5238

<sup>a</sup> These authors contributed equally to this article

<sup>b</sup> These authors share senior authorship

Content:

**Supplementary Figure S1:** DMSO effect on the viability of U87MG human glioblastoma cells.

**Supplementary Figure S2:** Densitometry of PARP1 level.

**Supplementary Figure S3:** The measure of the level of the phosphorylated (active) form of FAK (p-FAK).

**Supplementary Figure S4:** Quantification of the level of the phosphorylated (active) form of Akt (p-Akt).

**Supplementary Figure S5:** UPLC chromatogram of *Crataegus monogyna* berries (CB1).

**Supplementary Figure S6:** UPLC chromatogram of *Crataegus monogyna* leaves (CL1).

**Supplementary Figure S7:** UPLC chromatogram of *Crataegus monogyna* flowers (CF1).

**Supplementary Table S1:** EC<sub>50</sub> (µg/mL) values for the examined *Crataegus* extracts on the viability of U87MG human glioblastoma cells.

**Supplementary Table S2:** Content of polyphenolic compounds in berries, leaves and flowers of the different *Crataegus* species.

**Supplementary Table S3:** Extraction yield of particular samples (in %)

**Supplementary Table S4:** Calibration curve parameters of the method developed for each standard

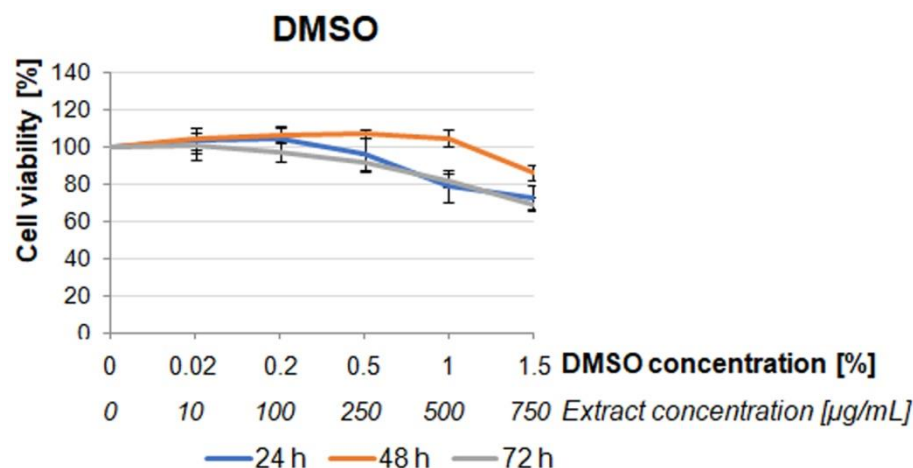

**Figure S1.** DMSO effect on the viability of U87MG human glioblastoma cells. Cells were treated up to 72 hours with different concentrations of DMSO (0.02–1.5%) depending on the flower extracts concentration (see lower raw). The viability

was assayed by the MTS test. The number of viable control (non-treated) cells of each time point served as 100%. Graphs represent mean values  $\pm$  SD from three independent experiments.

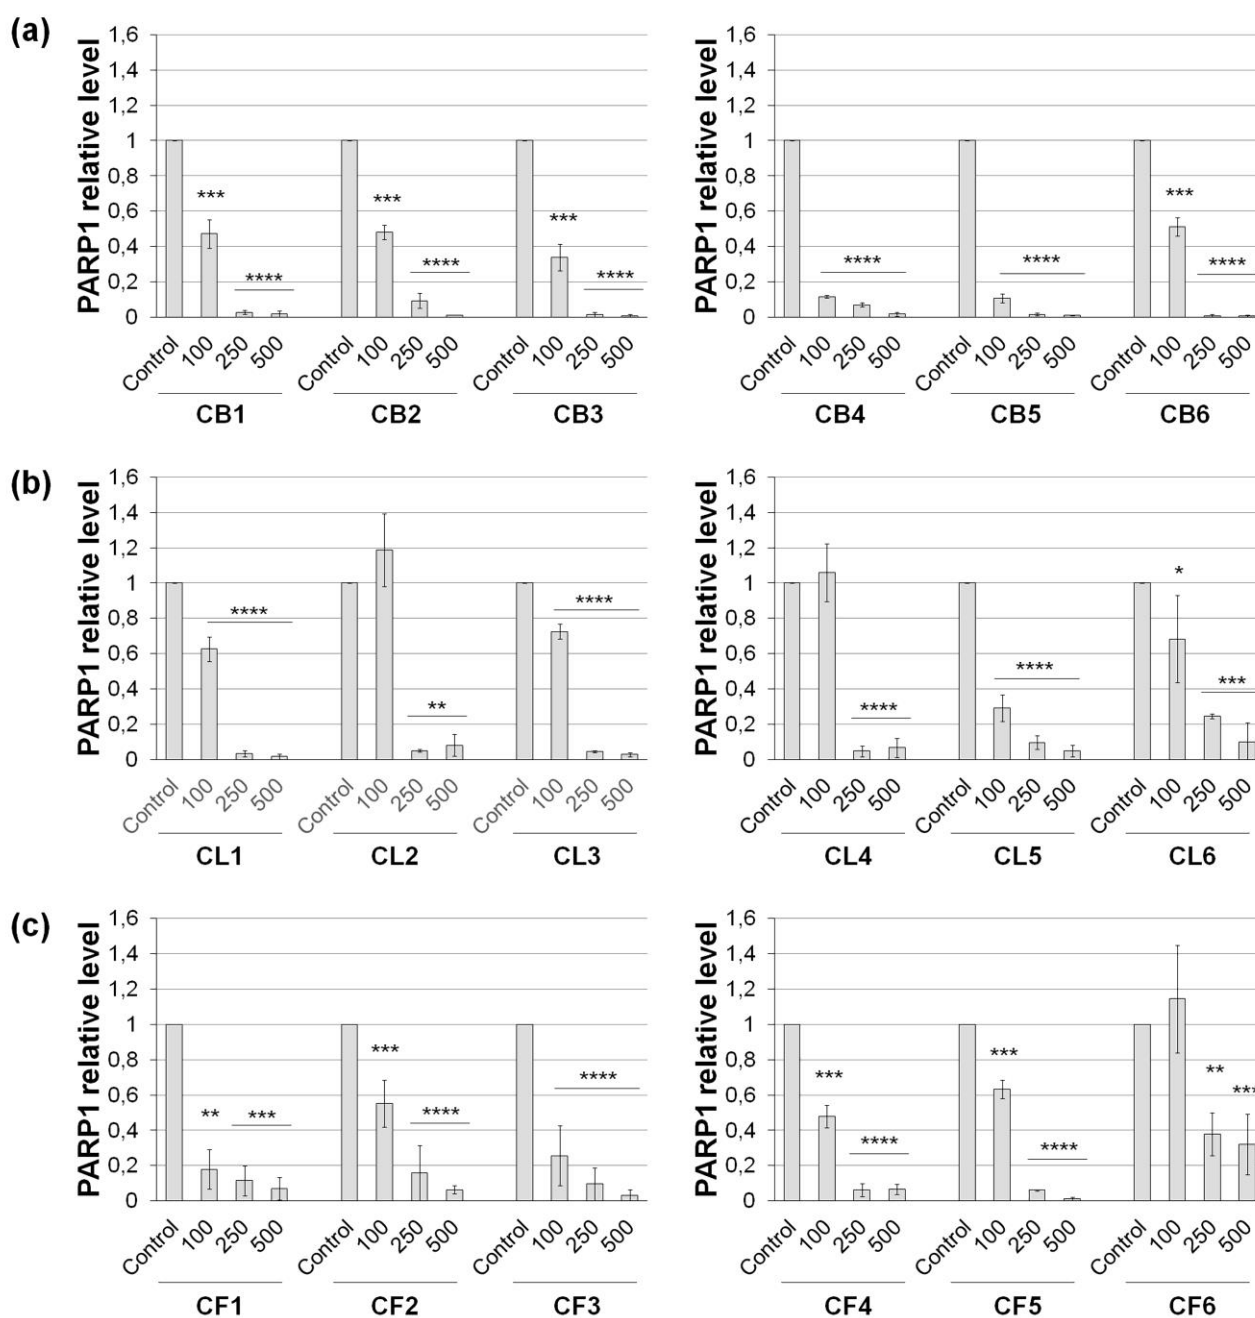

**Figure S2.** Densitometric analysis of the PARP1 level. Cells were incubated with *Crataegus* berry (a), leaf (b) and flower (c) extracts in 100, 250, and 500  $\mu$ g/mL concentrations for 48 h. Non-treated cells served as a control. Graphs represent mean value  $\pm$  SD. \*  $p < 0.05$ , \*\*  $p < 0.01$ , \*\*\*  $p < 0.001$ , \*\*\*\*  $p < 0.0001$  relative to control.

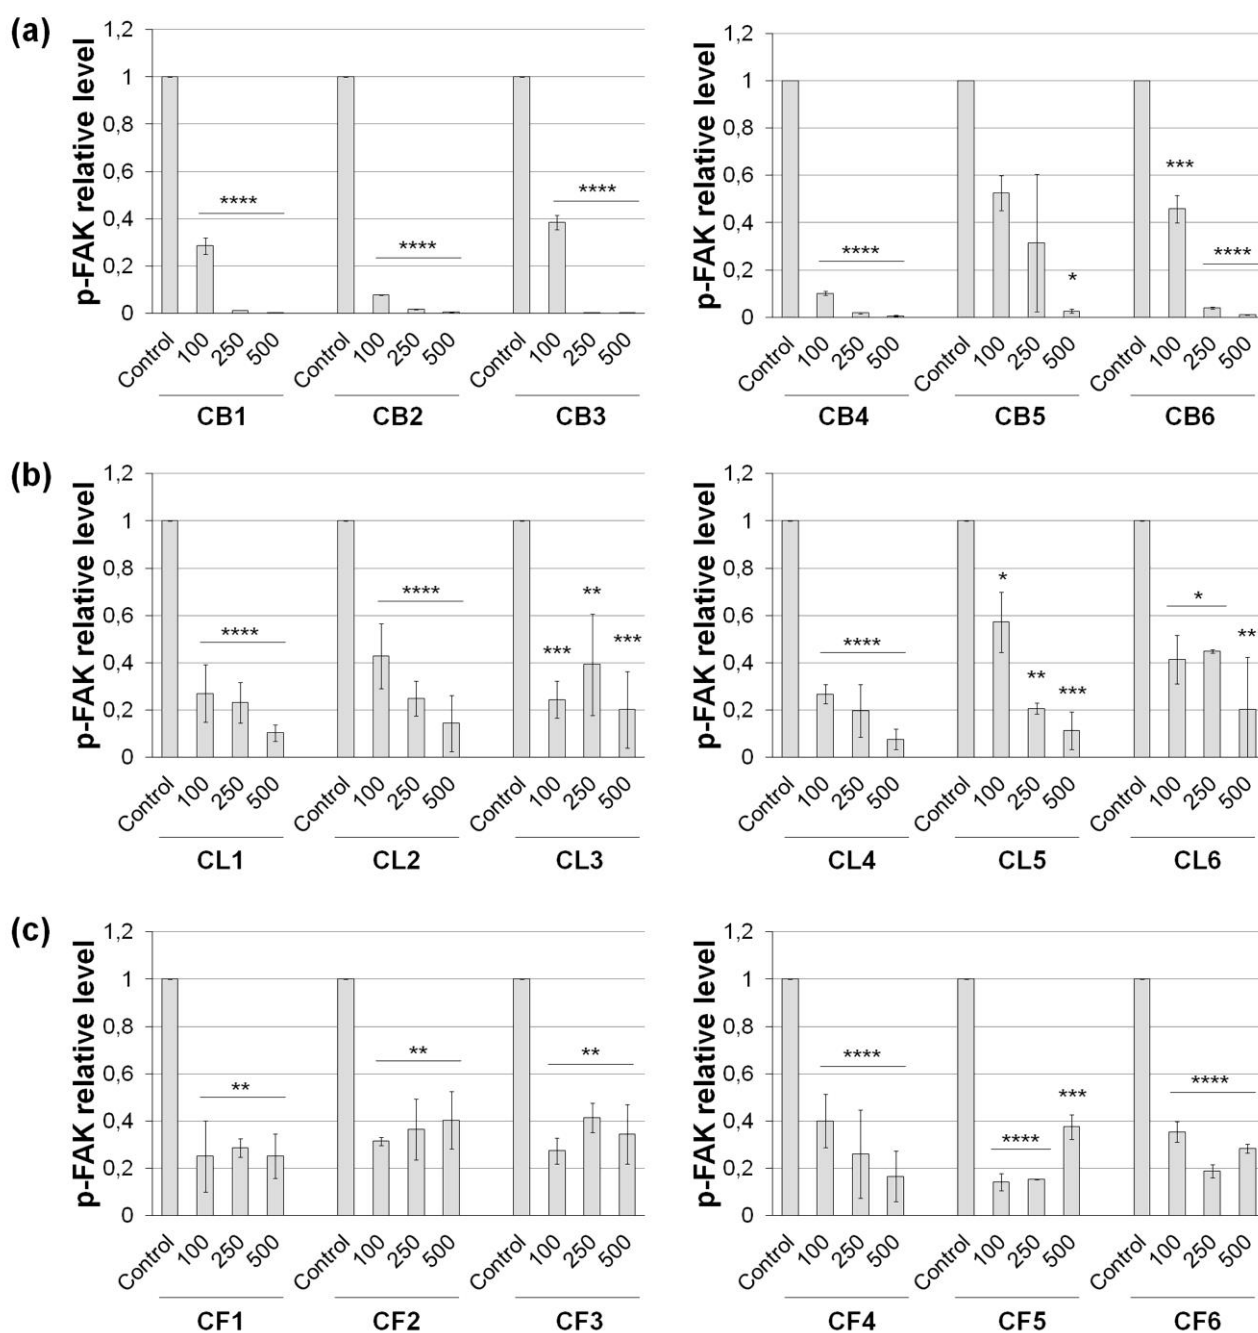

**Figure S3.** Densitometric analysis of the level of phosphorylated (active) form of FAK (p-FAK). Cells were incubated with *Crataegus* berry (a), leaf (b) and flower (c) extracts in 100, 250, and 500 µg/mL concentrations for 48 h. Non-treated cells served as a control. Graphs represent mean value ± SD. \*  $p < 0.05$ , \*\*  $p < 0.01$ , \*\*\*  $p < 0.001$ , \*\*\*\*  $p < 0.0001$  relative to control.

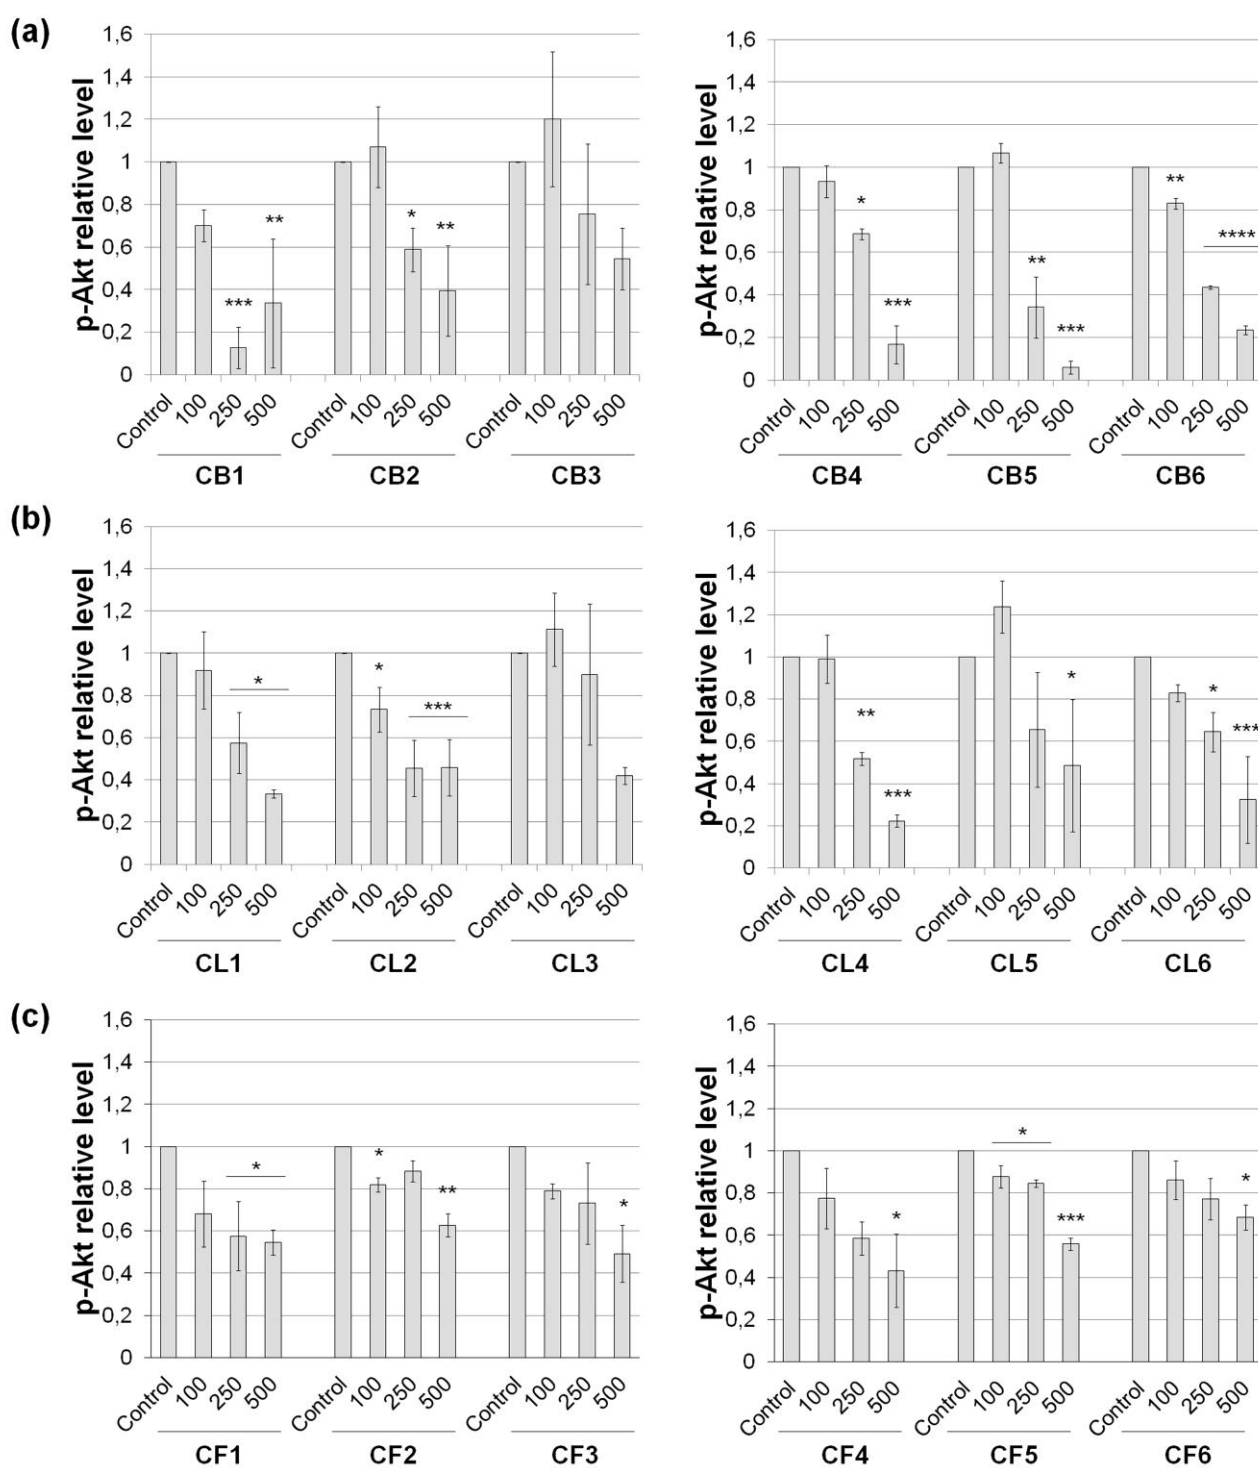

**Figure S4.** Densitometric analysis of the level of phosphorylated (active) form of Akt (p-Akt). Cells were incubated with *Crataegus* berry (a), leaf (b) and flower (c) extracts in 100, 250, and 500 µg/mL concentrations for 48 h. Non-treated cells served as a control. Graphs represent mean value  $\pm$  SD. \*  $p < 0.05$ , \*\*  $p < 0.01$ , \*\*\*  $p < 0.001$ , \*\*\*\*  $p < 0.0001$  relative to control.

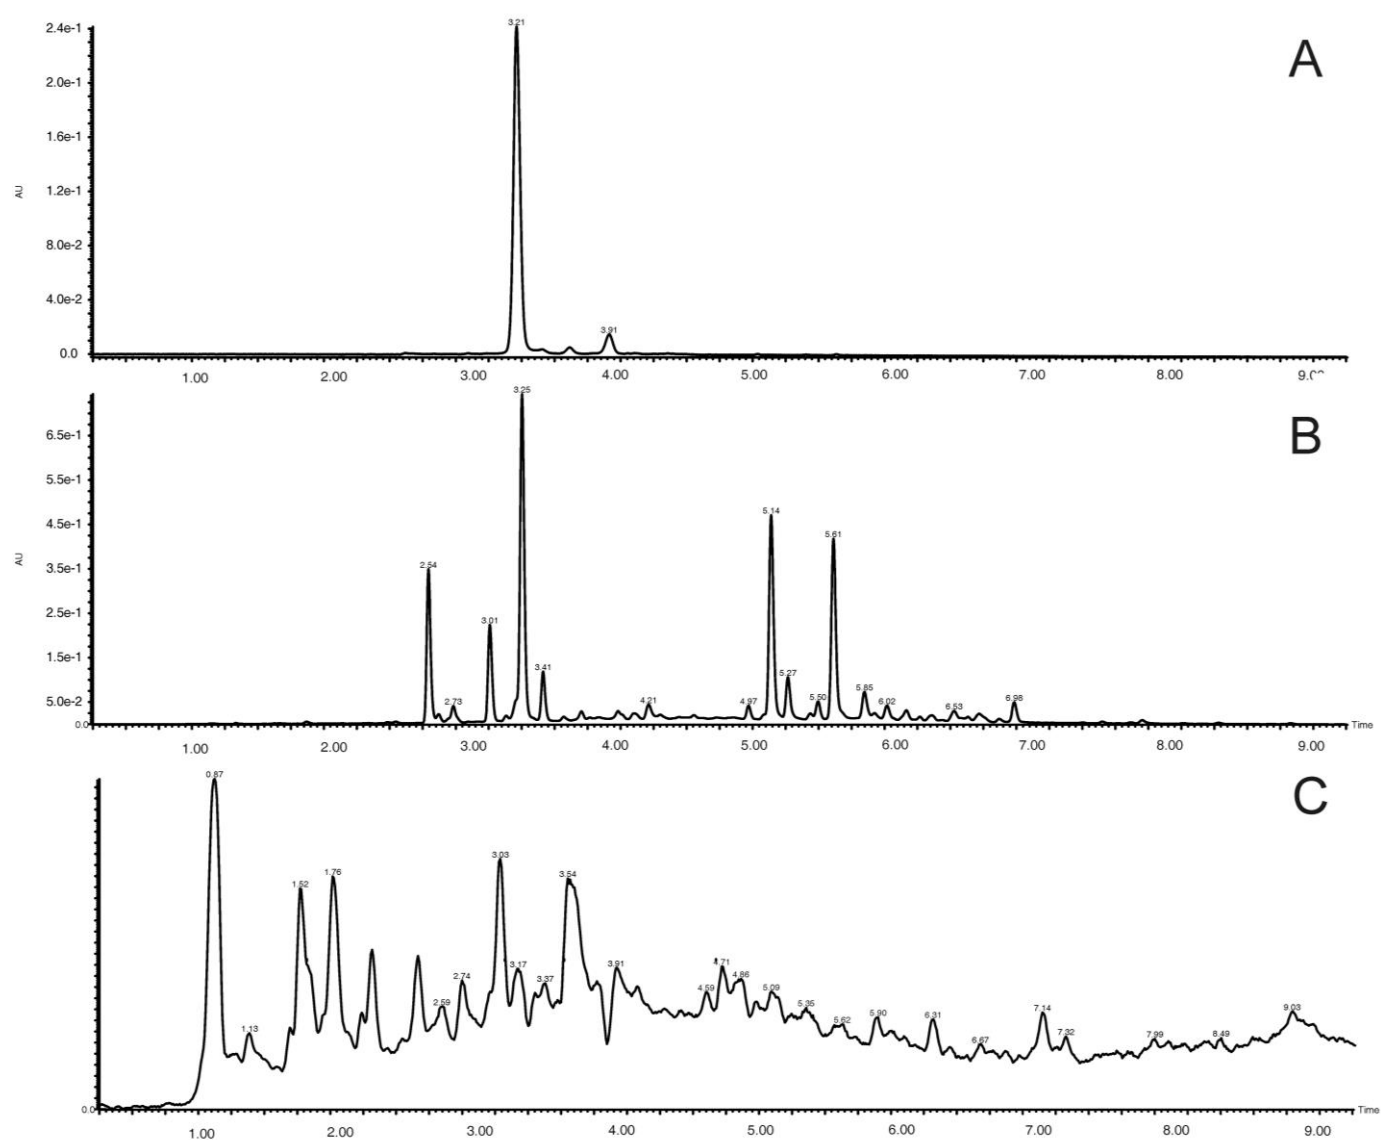

**Figure S5.** UPLC chromatogram of *Crataegus monogyna* berries (CB1). A, PDA chromatogram extracted at 520 nm for anthocyanins visualization, B, PDA chromatogram extracted at 350 nm for other phenolics, C – total ion current.

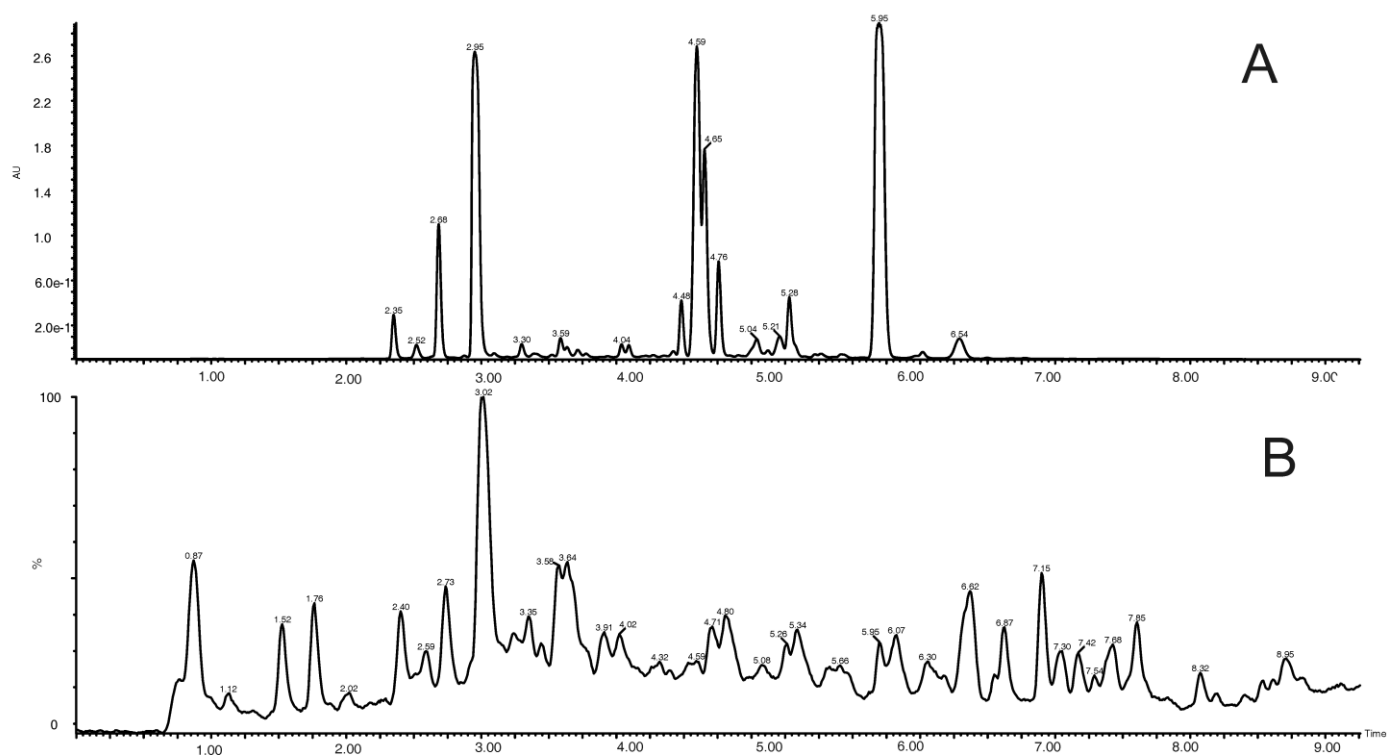

**Figure S6.** UPLC chromatogram of *Crataegus monogyna* leaves (CL1). A, PDA chromatogram extracted at 350 nm, B, total ion current.

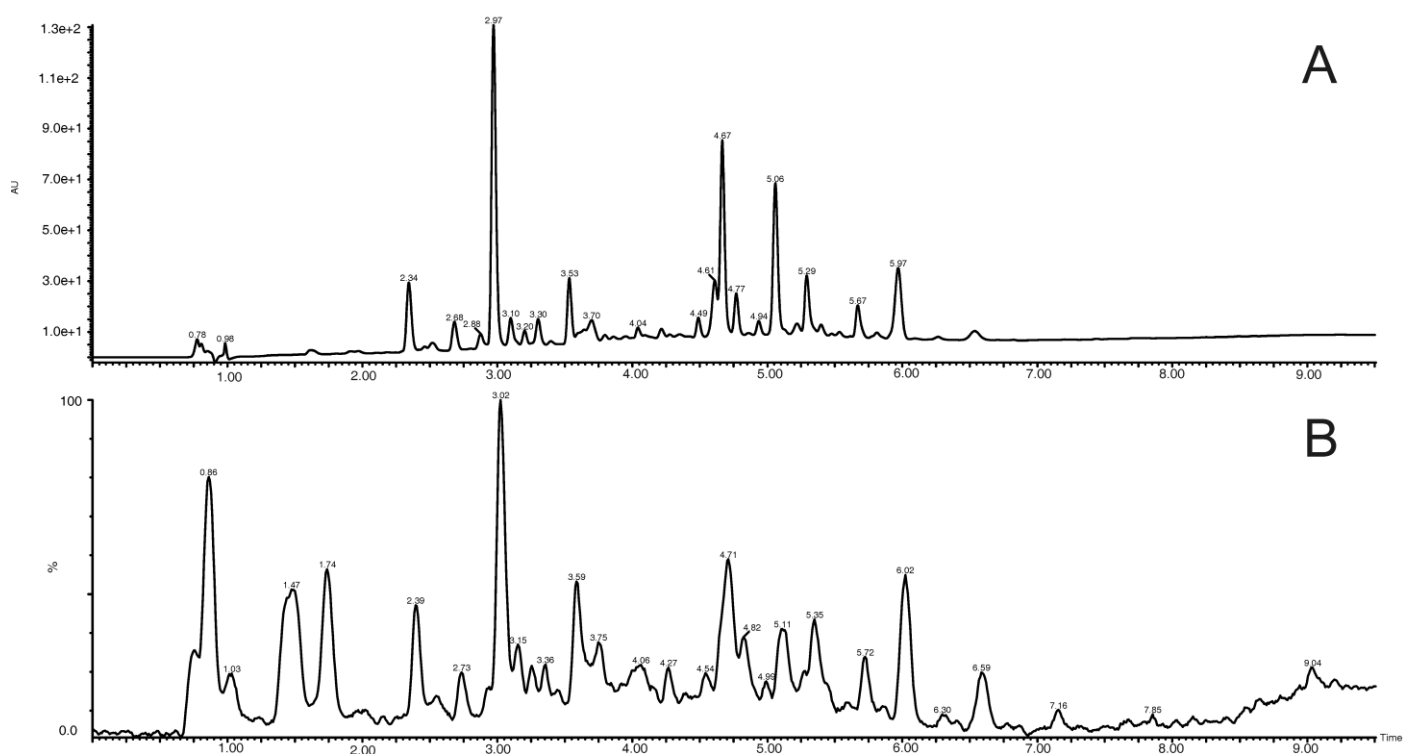

**Figure S7.** UPLC chromatogram of *Crataegus monogyna* flowers (CF1). A, PDA chromatogram extracted at 350 nm, B, total ion current.

**Table S1.** EC<sub>50</sub> (µg/mL) values for the examined *Crataegus* extracts on the viability of U87MG human glioblastoma cells.

| Samples | EC <sub>50</sub> , µg/mL |                |                |
|---------|--------------------------|----------------|----------------|
|         | Time, h                  |                |                |
|         | 24                       | 48             | 72             |
| CB1     | 200.26 ± 9.52            | 189.33 ± 4.87  | 181.87 ± 6.03  |
| CB2     | 198.55 ± 6.34            | 198.83 ± 4.32  | 183.89 ± 3.02  |
| CB3     | 168.65 ± 11.71           | 189.00 ± 15.09 | 209.49 ± 10.41 |
| CB4     | 180.88 ± 8.57            | 173.70 ± 5.50  | 180.44 ± 8.31  |
| CB5     | 227.88 ± 9.12            | 256.79 ± 9.11  | 335.42 ± 7.00  |
| CB6     | 356.82 ± 5.90            | 344.35 ± 7.61  | 395.09 ± 6.09  |
| CL1     | 218.79 ± 7.77            | 233.44 ± 2.70  | 214.41 ± 3.43  |
| CL2     | 450.96 ± 10.78           | 451.59 ± 15.02 | 403.36 ± 22.66 |
| CL3     | 263.12 ± 24.97           | 338.37 ± 6.58  | 310.73 ± 9.36  |
| CL4     | 185.84 ± 5.89            | 116.51 ± 22.21 | 184.27 ± 1.22  |
| CL5     | 174.01 ± 19.09           | 170.08 ± 2.69  | 207.07 ± 10.58 |
| CL6     | 236.67 ± 5.58            | 338.26 ± 11.88 | 379.43 ± 17.37 |
| CF1     | 343.02 ± 46.48           | 426.44 ± 12.95 | 460.29 ± 10.53 |
| CF2     | 462.38 ± 8.09            | 553.58 ± 13.47 | 551.79 ± 25.92 |
| CF3     | 429.91 ± 13.24           | 569.93 ± 17.74 | 559.15 ± 15.34 |
| CF4     | 329.95 ± 26.88           | 391.24 ± 8.53  | 440.99 ± 13.47 |
| CF5     | 636.48 ± 20.69           | 565.96 ± 17.66 | 523.63 ± 28.60 |
| CF6     | 629.78 ± 11.09           | 543.19 ± 30.67 | 440.29 ± 13.59 |

Values are expressed as mean ± SD from three independent experiments. Abbreviations: CB, *Crataegus* berry; CL, *Crataegus* leaf; CF, *Crataegus* flower extracts.

**Table S2.** Content of polyphenolic compounds in berries, leaves and flowers of the different *Crataegus* species.

| Compounds           |                            | Species of <i>Crataegus</i> |                  |                  |                   |                  |                   |
|---------------------|----------------------------|-----------------------------|------------------|------------------|-------------------|------------------|-------------------|
|                     |                            | 1                           | 2                | 3                | 4                 | 5                | 6                 |
| <i>Anthocyanins</i> |                            |                             |                  |                  |                   |                  |                   |
| Berries             | Cyanidin                   |                             |                  |                  |                   |                  |                   |
|                     | 1 3- <i>O</i> -glucoside   | 7.37 ± 0.07d                | 6.42 ± 0.01b     | 5.75 ± 0.01a     | 11.21 ± 0.05e     | 12.79 ± 0.27f    | 6.96 ± 0.02c      |
|                     | Pelargonidin               |                             |                  |                  |                   |                  |                   |
|                     | 2 3- <i>O</i> -rutinose    | 0.15 ± 0.02b                | 0.12 ± 0.01a     | 0.11 ± 0.01a     | 0.22 ± 0.01c      | 0.22 ± 0.00c     | 0.16 ± 0.00b      |
|                     | Cyanidin                   |                             |                  |                  |                   |                  |                   |
|                     | 3 3- <i>O</i> -arabinoside | 0.13 ± 0.00b                | 0.14 ± 0.01b     | 0.11 ± 0.00a     | 0.24 ± 0.01c      | 0.25 ± 0.01c     | 0.26 ± 0.00d      |
|                     | Peonidin                   |                             |                  |                  |                   |                  |                   |
|                     | 4 3- <i>O</i> -glucoside   | 0.41 ± 0.00c                | 0.42 ± 0.02c     | 0.29 ± 0.00b     | 0.25 ± 0.00ab     | 0.25 ± 0.04ab    | 0.21 ± 0.00a      |
|                     | Sum                        | 8.07 ± 0.09d                | 7.09 ± 0.13b     | 6.26 ± 0.02a     | 11.91 ± 0.07e     | 13.51 ± 0.32f    | 7.59 ± 0.03c      |
|                     | <i>Flavan-3-ols</i>        |                             |                  |                  |                   |                  |                   |
| 5                   | Procyanidin trimer         | 1439.52 ± 21.62a            | 1763.48 ± 18.20c | 1599.89 ± 4.70b  | 2000.45 ± 21.32de | 2048.89 ± 10.93e | 1877.19 ± 1.29cd  |
|                     | Procyanidin dimer          | 1717.54 ± 43.39a            | 2294.92 ± 13.81c | 2009.59 ± 19.49b | 2578.00 ± 17.93d  | 2762.86 ± 7.34e  | 2636.03 ± 20.84de |

|                             |                        |                   |                  |                  |                  |                  |                   |
|-----------------------------|------------------------|-------------------|------------------|------------------|------------------|------------------|-------------------|
| 7                           | (+)-Catechin           | 213.06 ± 30.29c   | 88.35 ± 5.30a    | 61.40 ± 1.93a    | 1073.04 ± 40.66d | 1451.14 ± 1.46e  | 153.14 ± 7.14b    |
| 8                           | (-)-Epicatechin        | 1399.75 ± 51.77a  | 1793.75 ± 5.68b  | 1419.88 ± 16.08a | 1800.44 ± 10.24b | 1839.19 ± 17.83b | 2092.24 ± 13.66c  |
| 9                           | Procyanidin tetramer   | 114.36 ± 1.41a    | 162.62 ± 5.71b   | 145.14 ± 6.67b   | 215.74 ± 7.61c   | 213.73 ± 4.76c   | 140.16 ± 2.94ab   |
| 10                          | Cinchonain             | 29.10 ± 0.66b     | 61.47 ± 7.29c    | 0.33 ± 0.38a     | 4.27 ± 0.23a     | 4.49 ± 0.08a     | 1.32 ± 0.40a      |
|                             | Sum                    | 4913.36 ± 149.14a | 6164.60 ± 56.00c | 5236.21 ± 49.26b | 7671.94 ± 97.99e | 8320.29 ± 42.41f | 6900.07 ± 57.91d  |
| <i>Hydrolyzable Tannins</i> |                        |                   |                  |                  |                  |                  |                   |
| 11                          | Ellagic acid pentoside | 52.31 ± 4.22ab    | 78.27 ± 4.54b    | 540.44 ± 19.81c  | 25.18 ± 1.46a    | 56.50 ± 2.75ab   | 679.17 ± 23.19d   |
| 12                          | Punicalin isomer I     | 293.34 ± 13.08a   | 367.42 ± 11.62b  | 357.38 ± 3.79b   | 408.15 ± 18.88c  | 426.93 ± 0.08c   | 406.85 ± 21.33c   |
| 13                          | Punicalin isomer II    | 39.31 ± 4.54a     | 22.52 ± 1.75a    | 60.82 ± 4.05a    | 42.49 ± 2.62a    | 113.56 ± 0.65b   | 57.17 ± 38.78a    |
| 14                          | 2-O-galloylpunicalin   | 52.73 ± 2.80a     | 59.47 ± 8.50a    | 86.05 ± 3.72b    | 135.17 ± 8.86c   | 136.76 ± 0.85c   | 56.38 ± 16.98a    |
| 15                          | Eucalbanin A           | 13.34 ± 0.70a     | 19.75 ± 0.06b    | 21.81 ± 1.44b    | 22.41 ± 1.06b    | 15.37 ± 0.80a    | 22.65 ± 2.95b     |
|                             | Sum                    | 451.04 ± 25.35a   | 547.43 ± 26.47b  | 1066.50 ± 32.82e | 633.41 ± 32.88c  | 749.13 ± 5.14d   | 1222.22 ± 103.25f |

*Phenolic acids*

|    |                               |                  |                  |                  |                  |
|----|-------------------------------|------------------|------------------|------------------|------------------|
| 16 | Quinic acid                   | 25.91 ± 1.16a    | 28.18 ± 2.38a    | 31.50 ± 6.13a    | 28.43 ± 2.95a    |
| 17 | Coumaroylquinic acid          | 118.21 ± 1.18a   | 124.46 ± 5.87a   | 113.45 ± 2.33a   | 194.09 ± 3.42b   |
| 18 | Protocatechuic acid glucoside | 54.25 ± 1.05c    | 181.48 ± 9.46f   | 39.29 ± 4.06b    | 100.26 ± 3.69d   |
| 19 | 4-O-caffeoylquinic acid       | 737.15 ± 23.08d  | 457.81 ± 4.47c   | 1043.00 ± 2.21e  | 1955.17 ± 7.62f  |
| 22 | 3-O-caffeoylquinic acid       | 745.73 ± 38.11c  | 867.99 ± 2.97d   | 319.66 ± 1.09a   | 1200.17 ± 9.13e  |
| 24 | 3,4-O-dicaffeoylquinic acid   | 101.86 ± 8.38d   | 42.11 ± 1.47c    | 13.35 ± 0.29a    | 23.81 ± 5.83ab   |
|    | Sum                           | 1783.12 ± 72.95d | 1702.03 ± 26.62c | 1560.25 ± 16.12b | 3501.93 ± 32.64e |

*Flavonols*

|    |                                   |                          |                           |                          |                           |
|----|-----------------------------------|--------------------------|---------------------------|--------------------------|---------------------------|
| 25 | 1,2,3,4-tetra-O-galloyl-glucoside | 8.68 ± 0.48c             | 5.99 ± 0.38b              | 9.72 ± 0.19c             | 6.00 ± 0.53b              |
| 26 | 1,3,4,6-tetra-O-galloyl-glucoside | 18.70 ± 1.70b            | 23.52 ± 3.27bc            | 9.58 ± 3.50a             | 34.82 ± 2.46d             |
| 27 | 2,3,4,6-tetra-O-galloyl-glucoside | 87.88 ± 2.88b            | 95.78 ± 0.13b             | 59.04 ± 2.78a            | 144.69 ± 6.69d            |
| 31 | Naringenin 7-O-glucoside          | 34.97 ± 1.02b            | 8.39 ± 0.63a              | 35.77 ± 0.82b            | 29.42 ± 4.71b             |
| 32 | Quercetin 3-O-glucoside           | 1062.82 ± 51.49c         | 662.74 ± 20.55a           | 1322.16 ± 3.80d          | 1409.36 ± 23.48e          |
| 33 | Quercetin 3-O-galactoside         | 345.65 ± 18.51d          | 191.83 ± 5.26b            | 455.82 ± 6.39e           | 297.54 ± 6.92c            |
| 35 | Myricetin 3-O-rhamnoside          | 114.94 ± 2.48c           | 523.56 ± 4.34e            | 56.89 ± 0.71a            | 117.30 ± 4.49c            |
| 37 | Cratenacin                        | 78.92 ± 6.67c            | 3.27 ± 0.79a              | nd                       | 72.67 ± 2.95c             |
|    | Sum                               | 1752.57 ± 85.23c         | 1515.09 ± 35.35b          | 1948.98 ± 18.18d         | 2111.81 ± 52.23e          |
|    | <b>Total (mg/100 g d.b.)</b>      | <b>8980.77 ± 332.76a</b> | <b>10000.07 ± 144.57b</b> | <b>9874.49 ± 116.40b</b> | <b>14038.21 ± 215.81e</b> |

*Flavan-3-ols*

|   |                    |               |                |                 |                |
|---|--------------------|---------------|----------------|-----------------|----------------|
| 5 | Procyanidin trimer | 78.78 ± 1.34c | 57.75 ± 4.24ab | 44.74 ± 12.91ab | 62.93 ± 1.63bc |
|---|--------------------|---------------|----------------|-----------------|----------------|



|                             |                                                             |                         |                         |                         |                         |   |
|-----------------------------|-------------------------------------------------------------|-------------------------|-------------------------|-------------------------|-------------------------|---|
| 6                           | Procyanidin dimer                                           | 904.13 ± 4.15d          | 759.88 ± 1.32c          | 1475.91 ± 1.03f         | 719.50 ± 1.04b          | 9 |
| 7                           | (+)-Catechin                                                | 167.68 ± 7.26c          | 168.51 ± 5.71c          | 93.74 ± 9.88a           | 89.44 ± 1.00a           | 1 |
|                             | Sum                                                         | 1150.59 ± 12.75e        | 986.14 ± 11.28d         | 1614.39 ± 23.82f        | 871.88 ± 3.66b          | 9 |
| <i>Hydrolyzable Tannins</i> |                                                             |                         |                         |                         |                         |   |
| 12                          | Punicalin isomer I                                          | 75.05 ± 0.11d           | 51.03 ± 4.82b           | 48.16 ± 0.04b           | 70.20 ± 0.56d           | 3 |
|                             | Sum                                                         | 75.05 ± 0.11d           | 51.03 ± 4.82b           | 48.16 ± 0.04b           | 70.20 ± 0.56d           | 3 |
| <i>Phenolic acids</i>       |                                                             |                         |                         |                         |                         |   |
| 20                          | Unidentified caffeic derivative                             | 441.64 ± 7.42d          | 264.98 ± 2.83b          | 188.07 ± 3.82a          | 180.78 ± 3.06a          | 2 |
| 21                          | 3- <i>O-p</i> -coumaroylquinic acid                         | 357.04 ± 5.87b          | 179.17 ± 9.79a          | 197.64 ± 33.50a         | 223.34 ± 3.79a          | 1 |
| 22                          | 3- <i>O</i> -caffeoylquinic acid                            | 1463.94 ± 6.23e         | 1247.22 ± 8.88d         | 1151.22 ± 12.52c        | 1026.81 ± 6.46b         | 9 |
| 23                          | Unidentified cumaric derivative                             | 131.93 ± 1.88f          | 103.63 ± 0.37e          | 79.37 ± 0.50b           | 25.35 ± 0.53a           | 1 |
| 24                          | 3,4- <i>O</i> -dicafeoylquinic acid                         | 197.09 ± 7.27e          | 127.37 ± 12.40c         | 53.98 ± 0.17a           | 91.05 ± 9.16b           | 1 |
|                             | Sum                                                         | 2591.63 ± 28.66d        | 1922.37 ± 34.27c        | 1670.28 ± 50.51b        | 1547.32 ± 23.01a        | 1 |
| <i>Flavonols</i>            |                                                             |                         |                         |                         |                         |   |
| 28                          | Apigenin 8- <i>C</i> -glucoside (vitexin)                   | 48.57 ± 3.57c           | 38.20 ± 3.18b           | 17.42 ± 2.64a           | 35.10 ± 4.36b           | 1 |
| 29                          | Luteolin 6,8- <i>C</i> -diglucoside                         | 50.81 ± 0.18bc          | 79.51 ± 1.75d           | 94.14 ± 0.03e           | 52.44 ± 3.30c           | 1 |
| 32                          | Quercetin 3- <i>O</i> -glucoside                            | 674.60 ± 0.84f          | 479.28 ± 3.48c          | 413.87 ± 1.93a          | 598.10 ± 2.05e          | 5 |
| 37                          | Cratenacin                                                  | 1672.30 ± 2.03f         | 1315.66 ± 1.90b         | 104.89 ± 7.34a          | 1659.41 ± 8.81e         | 1 |
|                             | Sum                                                         | 2446.28 ± 6.63f         | 1912.65 ± 10.31c        | 630.32 ± 11.95a         | 2345.05 ± 18.52e        | 2 |
|                             | <b>Total (mg/100 g d.b.)</b>                                | <b>6263.56 ± 48.04d</b> | <b>4872.18 ± 55.86c</b> | <b>3963.15 ± 86.27a</b> | <b>4834.46 ± 45.19c</b> | 4 |
| <i>Flavan-3-ols</i>         |                                                             |                         |                         |                         |                         |   |
| 6                           | Procyanidin dimer                                           | 192.06 ± 5.27cd         | 171.94 ± 1.79a          | 187.02 ± 2.85bc         | 275.68 ± 2.22e          | 1 |
| 7                           | (+)-Catechin                                                | 221.65 ± 3.62d          | 147.20 ± 5.60b          | 160.24 ± 2.39c          | 165.86 ± 1.02c          | 1 |
|                             | Sum                                                         | 413.71 ± 8.89c          | 319.15 ± 7.40a          | 347.27 ± 5.25b          | 441.54 ± 3.25d          | 3 |
| <i>Phenolic acids</i>       |                                                             |                         |                         |                         |                         |   |
| 20                          | Unidentified caffeic derivative                             | 284.61 ± 7.72d          | 68.56 ± 2.63ab          | 75.16 ± 1.77b           | 78.61 ± 1.68b           | 6 |
| 21                          | 3- <i>O-p</i> -coumaroylquinic acid                         | 551.02 ± 11.27c         | 113.29 ± 3.59a          | 106.53 ± 0.85a          | 294.61 ± 19.07b         | 3 |
| 22                          | 3- <i>O</i> -caffeoylquinic acid                            | 2588.40 ± 47.41d        | 988.45 ± 1.31a          | 1077.11 ± 8.51a         | 1366.45 ± 6.08b         | 4 |
| 23                          | Unidentified cumaric derivative                             | 169.77 ± 2.47e          | 51.74 ± 0.01b           | 57.89 ± 1.18c           | 103.55 ± 2.85d          | 4 |
| 24                          | 3,4- <i>O</i> -di-cafeoylquinic acid                        | 458.56 ± 16.07e         | 140.15 ± 0.30b          | 165.82 ± 23.03b         | 89.87 ± 0.44a           | 2 |
|                             | Sum                                                         | 4052.36 ± 84.94e        | 1362.20 ± 7.85a         | 1482.51 ± 35.25a        | 1933.07 ± 30.13b        | 2 |
| <i>Flavonols</i>            |                                                             |                         |                         |                         |                         |   |
| 30                          | Quercetin 3- <i>O</i> -rutinoside (rutin)                   | 35.45 ± 2.00b           | 36.66 ± 0.55b           | 40.41 ± 0.95c           | 56.75 ± 0.35d           | 5 |
| 32                          | Quercetin 3- <i>O</i> -glucoside                            | 2023.70 ± 11.10d        | 496.88 ± 13.09a         | 513.48 ± 11.27a         | 849.00 ± 28.40b         | 1 |
| 33                          | Quercetin 3- <i>O</i> -galactoside                          | 284.52 ± 1.30b          | 80.44 ± 2.16a           | 87.25 ± 2.05a           | 107.84 ± 6.87a          | 3 |
| 34                          | Quercetin 3- <i>O</i> -acetyl hexoside                      | 135.95 ± 7.72b          | 398.37 ± 1.08c          | 470.60 ± 18.59d         | 485.67 ± 21.97d         | 4 |
| 36                          | Apigenin<br>6- <i>C</i> -glucoside-8- <i>C</i> -arabinoside | 250.39 ± 7.80d          | 77.67 ± 0.24a           | 73.23 ± 4.33a           | 92.45 ± 5.94b           | 1 |
| 37                          | Cratenacin                                                  | 521.92 ± 8.01f          | 257.45 ± 1.02a          | 284.17 ± 2.60b          | 389.44 ± 6.30c          | 5 |
|                             | Sum                                                         | 3251.93 ± 37.93d        | 1347.48 ± 18.14a        | 1469.14 ± 39.79a        | 1981.15 ± 69.85b        | 2 |

|                              |                                     |                                    |                                    |                                     |
|------------------------------|-------------------------------------|------------------------------------|------------------------------------|-------------------------------------|
| <b>Total (mg/100 g d.b.)</b> | <b>7718.00 ± 131.76<sup>f</sup></b> | <b>3028.82 ± 33.39<sup>a</sup></b> | <b>3298.92 ± 80.38<sup>b</sup></b> | <b>4355.76 ± 103.22<sup>c</sup></b> |
|------------------------------|-------------------------------------|------------------------------------|------------------------------------|-------------------------------------|

Values are given in mg/100 g d.b. (dry basis) and are expressed as mean ± SD. Statistical significance was analyzed with Duncan's test. Values marked with different letters (between species) in the same row indicate statistically significant differences ( $p < 0.05$ ), for more details see Materials and Methods; nd, not detected.

**Table S3.** Extraction yield of particular samples (in %).

| Samples | Extraction yield (%) |        |         |
|---------|----------------------|--------|---------|
|         | Berries              | Leaves | Flowers |
| C1      | 6.27                 | 10.05  | 9.34    |
| C2      | 5.73                 | 8.34   | 8.98    |
| C3      | 5.25                 | 7.69   | 7.43    |
| C4      | 5.69                 | 8.61   | 8.40    |
| C5      | 7.40                 | 9.38   | 5.83    |
| C6      | 6.32                 | 9.47   | 5.93    |

**Table 4.** Calibration curve parameters of the method developed for each standard.

| No                          | Compound                    | Linearity range<br>[μg/mL] | Regression<br>equation           | R <sup>2</sup> | LOD<br>[μg/mL] | LOQ<br>[μg/mL] |
|-----------------------------|-----------------------------|----------------------------|----------------------------------|----------------|----------------|----------------|
| <i>Anthocyanins</i>         |                             |                            |                                  |                |                |                |
| 1                           | Cyanidin<br>3-O-glucoside   | 25 - 250                   | $y = 1.66 \times 10^{-5} - 8.92$ | 0.998          | 0.015          | 0.045          |
| <i>Flavan-3-ols</i>         |                             |                            |                                  |                |                |                |
| 2                           | (+)-catechin                | 25 - 250                   | $y = 1.4 \times 10^{-5} - 6.36$  | 0.999          | 0.013          | 0.038          |
| <i>Hydrolyzable tannins</i> |                             |                            |                                  |                |                |                |
| 3                           | Ellagic acid                | 25 - 250                   | $y = 2.98 \times 10^{-5} + 0.30$ | 0.999          | 0.027          | 0.081          |
| <i>Phenolic acids</i>       |                             |                            |                                  |                |                |                |
| 4                           | 3-O-caffeoylquini<br>c acid | 25 - 250                   | $y = 6.16 \times 10^{-5} - 3.40$ | 0.997          | 0.055          | 0.168          |
| 5                           | <i>p</i> -coumaric acid     | 25 - 250                   | $y = 8.19 \times 10^{-5} - 0.06$ | 0.999          | 0.074          | 0.22           |
| 6                           | Protocatechuic<br>acid      | 25 - 250                   | $y = 7.8 \times 10^{-5} - 0.04$  | 0.998          | 0.07           | 0.213          |
| <i>Flavonols</i>            |                             |                            |                                  |                |                |                |
| 7                           | Apigenin<br>8-C-glucoside   | 25 - 250                   | $y = 1.33 \times 10^{-5} - 4.02$ | 0.999          | 0.012          | 0.036          |
| 8                           | Quercetin<br>3-O-rutinoside | 25 - 250                   | $y = 4.85 \times 10^{-5} + 0.78$ | 0.999          | 0.048          | 0.132          |
| 9                           | Naringenin<br>7-O-glucoside | 25 - 250                   | $y = 4.78 \times 10^{-5} - 7.86$ | 0.999          | 0.043          | 0.13           |
| 10                          | Luteolin<br>7-O-glucoside   | 25 - 250                   | $y = 4.52 \times 10^{-5} - 0.06$ | 0.998          | 0.047          | 0.123          |
| 11                          | Myricetin<br>3-O-glucoside  | 25 - 250                   | $y = 2.98 \times 10^{-5} - 1.6$  | 0.989          | 0.027          | 0.081          |
